RESEARCH ARTICLE

# A Comparison of Anthropometric Measures for Assessing the Association between Body Size and Risk of Chronic Low Back Pain: The HUNT Study

Ingrid Heuch<sup>1\*</sup>, Ivar Heuch<sup>2</sup>, Knut Hagen<sup>3,4</sup>, John-Anker Zwart<sup>1,5</sup>

**1** Department of Neurology and FORMI, Oslo University Hospital, Oslo, Norway, **2** Department of Mathematics, University of Bergen, Bergen, Norway, **3** Department of Neuroscience, Norwegian University of Science and Technology, Trondheim, Norway, **4** Norwegian National Headache Centre, Department of Neurology, St. Olavs Hospital, Trondheim, Norway, **5** Faculty of Medicine, University of Oslo, Oslo, Norway

\* [ingrid.heuch@ous-hf.no](mailto:ingrid.heuch@ous-hf.no)

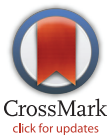

 OPEN ACCESS

**Citation:** Heuch I, Heuch I, Hagen K, Zwart J-A (2015) A Comparison of Anthropometric Measures for Assessing the Association between Body Size and Risk of Chronic Low Back Pain: The HUNT Study. PLoS ONE 10(10): e0141268. doi:10.1371/journal.pone.0141268

**Editor:** David Meyre, McMaster University, CANADA

**Received:** June 23, 2015

**Accepted:** October 5, 2015

**Published:** October 27, 2015

**Copyright:** © 2015 Heuch et al. This is an open access article distributed under the terms of the [Creative Commons Attribution License](https://creativecommons.org/licenses/by/4.0/), which permits unrestricted use, distribution, and reproduction in any medium, provided the original author and source are credited.

**Data Availability Statement:** The dataset that is analysed belongs to a third party: the HUNT study (the Nord-Trøndelag Health Study). The authors of the current manuscript are not affiliated with the project as such, but have been given permission to analyse the data after obtaining the necessary Norwegian permits. Because of confidentiality requirements imposed by Norwegian law, data sets with information from a complete county at the individual level cannot be made public. Research groups wishing to analyse data from the HUNT study may apply to the HUNT organization (<http://www.ntnu.edu/hunt>) to get access. Procedures for obtaining the

## Abstract

### Background

Previous work indicates that overweight and obese individuals carry an increased risk of experiencing chronic low back pain (LBP). It is not known, however, how the association with body size depends on the choice of anthropometric measure used.

### Objective

This work compares relationships with LBP for several measures of body size. Different results may indicate underlying mechanisms for the association between body size and risk of LBP.

### Methods

In a cohort study, baseline information was collected in the community-based HUNT2 (1995–1997) and HUNT3 (2006–2008) surveys in Norway. Participants were 10,059 women and 8725 men aged 30–69 years without LBP, and 3883 women and 2662 men with LBP at baseline. Associations with LBP at end of follow-up were assessed by generalized linear modeling, with adjustment for potential confounders.

### Results

Relationships between waist-hip-ratio and occurrence of LBP at end of follow-up were weak and non-significant after adjustment for age, education, work status, physical activity, smoking, lipid levels and blood pressure. Positive associations with LBP at end of follow-up were all significant for body weight, BMI, waist circumference and hip circumference after similar adjustment, both in women without and with LBP at baseline, and in men without LBP at baseline. After additional mutual adjustment for anthropometric measures, the magnitude of

necessary permits are described on the web page <http://www.ntnu.edu/hunt/data>.

**Funding:** This study was supported by grants from the Legacy of Trygve Gythfeldt and Wife. The funder had no role in study design, data collection and analysis, decision to publish, or preparation of the manuscript. Ingrid Heuch received the funding.

**Competing Interests:** The authors have declared that no competing interests exist.

the association with body weight increased in women without LBP at baseline (RR: 1.130 per standard deviation, 95% CI: 0.995–1.284) and in men (RR: 1.124, 95% CI 0.976–1.294), with other measures showing weak associations only.

## Conclusion

Central adiposity is unlikely to play a major role in the etiology of LBP. Total fat mass may be one common factor underlying the associations observed. The association with body weight remaining after mutual adjustment may reflect mechanical or structural components behind the relationship between overweight or obesity and LBP.

## Introduction

Both obesity and low back pain (LBP) represent major health problems in today's society. Obesity is associated with serious disorders as cardiovascular disease, diabetes and cancer [1]. LBP causes more global disability than any other condition [2], with immense costs to society in terms of suffering and lost productivity [3]. It is therefore important to determine risk factors for LBP and explore potential relations with obesity.

The great majority of the cases of LBP seen in clinical practice are nonspecific and cannot be assigned any particular pathoanatomical diagnosis [4]. Yet at the population level, epidemiologic studies have shown associations between occurrence of LBP and risk factors such as physical activity [5], work status [6] and cigarette smoking [7], although results from different populations have not always been consistent. It has also been suspected for a long time that overweight and obesity may be associated with the risk of LBP [8], but despite the large number of studies exploring this relationship, early reviews [9–11] did not reach any firm conclusion. The main impression was that extreme obesity was likely to confer a higher risk of LBP but that definite statements could not be made about overweight. A more recent meta-analysis [12] summarizing results reported until 2009 concluded, however, that the overall evidence, incorporating results from cross-sectional and prospective studies, supported an increased risk of LBP for both overweight and obesity. This result was confirmed in additional large prospective studies [13,14] carried out after the meta-analysis [12].

Most population studies of associations with LBP have focused on body mass index (BMI) as the measure of body size, with overweight and obesity defined in terms of BMI. Some studies have also dealt with associations with body weight [15–17]. Waist circumference has been considered as an alternative measure in quite a few studies [18–20], sometimes in combination with the waist-hip-ratio [17,21,22]. The total evidence supporting an association between body size and risk of LBP still rests essentially on data involving BMI.

Various mechanisms have been proposed to explain associations between body size and LBP [12,23]. A heavy mechanical load may lead to greater compressive forces or increased shear on the structures of the lumbar spine [12]. Structural modifications involving disc degeneration [24] or Modic changes in vertebral endplates [25] may be related to increasing loads. Moreover, impaired spinal mobility in overweight individuals [26] may affect disc nutrition [12]. Blood supply to the lumbar region may also be affected by atherosclerosis [27], which in turn may be associated with adiposity. More generally, a large amount of fat tissue may lead to an elevated production of cytokines and acute-phase reactants [28], activating pro-inflammatory pathways and producing pain. Finally, emotional [9] or behavioral [23] components may play a certain role.

A comparison of associations between various measures of body size and LBP may provide a clue as to which underlying mechanisms are most plausible. BMI constitutes the classic standardized measure of body size which is closely related to overall subcutaneous fat mass [29] but also represents skeletal muscle mass, especially in men [30]. BMI does not, however, reflect the distribution of the fat mass, in contrast to a measure such as waist circumference, which is more strongly correlated with abdominal fat mass, both subcutaneous and intraabdominal [29]. The waist-hip-ratio often seems to serve as a better standardized measure of central adiposity than BMI or waist circumference, in particular among elderly [31]. Hip circumference regarded as a separate measure of body size may also be associated with health indicators in different ways from waist circumference and BMI [32], perhaps reflecting other aspects of the distribution of fat and muscle tissue. Simple body weight is still strongly related to fat mass percentage [33].

If mechanical or structural factors play a major role in explaining associations between body size and LBP, strong associations should be observed in particular considering body weight and maybe BMI, although other measures could also be affected. If, on the other hand, physiological mechanisms are important, especially those involving abdominal fat mass and inflammation, measures such as waist circumference or waist-hip-ratio should show strong associations. To distinguish between such possibilities, it is essential to study associations with different relevant measures in the same data set, with standardized adjustment for other risk factors. Although relevant causal mechanisms may be quite different, similar comparisons of associations with different measures of body size have been performed for risk of cardiovascular disease and cancer and for overall mortality. Some studies have indicated that measures of abdominal obesity may have a predictive ability which is at least equal to that of BMI [34–36].

In this study, which is based on an 11 year follow-up of a large Norwegian cohort of adults, we compare associations with occurrence of chronic LBP for body weight, BMI, waist circumference, hip circumference and waist-hip-ratio. Separate analyses are performed to study risk of subsequent LBP among subjects without LBP at baseline and recurrence or persistence of LBP among those reporting LBP at baseline. The same data set has previously been used to study associations between occurrence of LBP and body height [37] and overweight and obesity as assessed by BMI [14].

## Material and Methods

### Study design

The Nord-Trøndelag Health Study (HUNT) is a population-based study of an entire county in Norway, with information on health status being collected over a long period [38]. Three consecutive surveys have been carried out; HUNT1 in 1984–86 [39], HUNT2 in 1995–97 [38] and HUNT3 in 2006–08 [40]. The work presented here is based on data from the HUNT2 and HUNT3 surveys.

In 1995–97 all residents of Nord-Trøndelag aged 20 years or more received an invitation to participate in the HUNT2 survey, with a questionnaire enclosed on health status [38]. One question was formulated in this manner: "During the last year, have you had pain and/or stiffness in your muscles and limbs that has lasted for at least 3 consecutive months?" If a respondent answered in the affirmative, the following question was asked: "Where did you have pain and/or stiffness?" The lower back was one site listed among several possibilities. Respondents checking this alternative were regarded as suffering from chronic LBP [41]. Participants were also invited to a clinical consultation which included measurement of height, weight and waist and hip circumference. Additional measurements were made of blood pressure and lipid levels in non-fasting blood. Among a total population of 30,022 men and 28,906 women in the age

interval 30–69 years, 21,442 men and 23,205 women indicated whether they suffered from chronic LBP and had measurements performed of height, weight, waist and hip, corresponding to a participation rate of 75.8%.

Similar information was collected in the HUNT3 survey, carried out in 2006–2008 with a corresponding target population. Only information on status of back pain from HUNT3 is considered in the present prospective study, in combination with the baseline information from HUNT2. The follow-up aimed at the cohort consisting of 44,647 individuals aged 30–69 years when they participated in the HUNT2 survey, with information available on height, weight, waist and hip circumference and presence or absence of chronic low back pain. Participants outside this age range in HUNT2 were excluded because of relatively low participation rates in the subsequent HUNT3 study [42]. During the period of follow-up, from HUNT2 to HUNT3, 2631 individuals in this cohort died, 1675 individuals left the county of Nord-Trøndelag, and one individual disappeared. Furthermore, 15,012 members of the cohort residing in the county at the time of HUNT3 did not participate or did not supply information about low back pain. Thus a total of 25,329 participants, 11,387 men and 13,942 women, were available for analysis after follow-up, representing 62.8% of the remaining individuals resident in the county and 56.7% of the original cohort.

Each participant in the HUNT2 and HUNT3 surveys signed a written informed consent regarding the collection and use of data for research purposes. The work was approved by the Regional Committee for Medical and Health Research Ethics in Central Norway, and HUNT was also approved by the Norwegian Data Inspectorate.

## Exposure and covariate assessment

Height and weight were measured with the participants wearing light clothes without shoes, height to the nearest 1.0 cm and weight to the nearest 0.5 kg. Waist and hip circumferences were measured with a steel band to the nearest 1.0 cm, with participants standing and arms hanging relaxed. Waist circumference was measured horizontally at the height of the umbilicus, and hip circumference was measured at the thickest part of the hip. Body mass index was defined as weight/height<sup>2</sup>.

Baseline age was categorized into 10 year intervals. Education was grouped according to duration, as  $\leq 9$ , 10–12, or  $\geq 13$  years. Categories of cigarette smoking represented current daily smoking, previous daily smoking, and never daily smoking.

For physical activity in leisure time, including going to work, one category included those engaged in light activity only or hard physical activity (leading to sweating or being out of breath)  $< 1$  hour per week. Other categories represented hard physical activity 1–2 and  $\geq 3$  hours per week.

Four categories of work status were defined, the first comprising people being employed or carrying out professional work. The second category included those temporarily out of work, students and individuals in military service. The third category included pensioners and people receiving social security support, and the fourth category represented women occupied full-time with housework. Those currently working supplied information about physical activity at work, in four categories representing substantially sedentary work, work involving extensive walking, work leading to both walking and lifting, and work involving particularly strenuous activities.

Systolic blood pressure was categorized as  $< 120$ , 120–139, 140–159,  $\geq 160$  mmHg, and diastolic blood pressure as  $< 80$ , 80–89, 90–99,  $\geq 100$  mmHg. Lipid levels in non-fasting blood were measured by enzymatic colorimetric procedures and were categorized by quintiles [43].

## Statistical analysis

The distributions of measures of body size were described separately for women and men by mean values and standard deviations within categories of LBP status at baseline. Interrelations between different measures were characterized by correlation coefficients.

Analyses of associations between anthropometric measures and risk and recurrence or persistence of chronic LBP at end of follow-up were conducted by generalized linear modeling with a log link, with adjustment for potential confounders. All analyses were carried out separately for women and men without and with LBP at baseline. One set of analyses included linear effects of sex-specific standardized versions of the measures of body size, producing relative risks of LBP per standard deviation of each measure. This procedure made it possible to compare the magnitude of the different associations even though the measured values were expressed in very different units. Linearity was checked for by adding quadratic and cubic terms to the regression models. Categorical analyses were based on a subdivision of the range for each measure in sex-specific quintiles, determined considering the total cohort at baseline. This approach also facilitated a direct comparison of the magnitude of associations for different measures.

Adjustment was first made for age only in a basic set of analyses. Additional categorical adjustment was then performed for a number of factors likely to be associated both with the anthropometric measures and occurrence of LBP, such as education, work status, physical activity in leisure time and at work, smoking, lipid levels and blood pressure. Finally, mutual adjustment was also carried out among the anthropometric measures showing a significant influence in the separate analyses, considering linear effects.

As information was missing on some potential confounders in a minor fraction of the data set, the analyses with complete adjustment were based on a somewhat lower number of individuals than the basic age-adjusted analyses.

All statistical analyses were carried out using IBM SPSS version 21 (IBM Corp., Armonk, New York).

## Results

### Descriptive baseline measures

Mean values of the anthropometric measures were in general slightly greater among individuals with chronic LBP at baseline than in those without LBP, both in women and men ([Table 1](#)). Taking the variation in the population into account, expressed by the standard deviations ([Table 1](#)), the groups with and without LBP at baseline were still largely comparable.

Correlations between anthropometric measures among participants without LBP at baseline ([Table 2](#)) were quite high, in the range from 0.76 to 0.91, except for the waist-hip-ratio which showed much lower correlations with body weight, BMI and hip circumference. No major differences were observed between women and men, although correlations in the upper range were slightly lower in men. Corresponding correlations computed among individuals with LBP at baseline were very similar to those displayed in [Table 2](#).

### Associations with risk of LBP

With adjustment for age only, all measures of body size showed highly significant positive relationships with risk of LBP among individuals not affected by LBP at baseline, in women as well as in men ([Table 3](#)). In women, the strongest association was seen for waist circumference, although the strength of the association was quite similar for body weight and BMI. In men,

**Table 1. Mean values (with standard deviations) of anthropometric measures at baseline.**

|                          | Women                   |         |                      |         | Men                     |         |                      |         |
|--------------------------|-------------------------|---------|----------------------|---------|-------------------------|---------|----------------------|---------|
|                          | Without LBP at baseline |         | With LBP at baseline |         | Without LBP at baseline |         | With LBP at baseline |         |
| <i>n</i>                 | 10,059                  |         | 3883                 |         | 8725                    |         | 2662                 |         |
| Body weight (kg)         | 70.2                    | (11.7)  | 72.3                 | (12.4)  | 84.3                    | (11.5)  | 84.6                 | (11.5)  |
| BMI (kg/m <sup>2</sup> ) | 25.8                    | (4.2)   | 26.6                 | (4.4)   | 26.5                    | (3.2)   | 26.7                 | (3.3)   |
| Waist circumference (cm) | 80.0                    | (10.4)  | 82.4                 | (11.0)  | 91.6                    | (8.4)   | 92.5                 | (8.6)   |
| Hip circumference (cm)   | 101.1                   | (8.8)   | 102.8                | (9.0)   | 102.4                   | (5.7)   | 102.7                | (5.7)   |
| Waist-hip-ratio          | 0.790                   | (0.056) | 0.800                | (0.059) | 0.894                   | (0.052) | 0.900                | (0.054) |

LBP, low back pain; BMI, body mass index.

doi:10.1371/journal.pone.0141268.t001

BMI showed the strongest association with risk of LBP, followed by body weight and waist circumference.

After additional adjustment for education, work status, physical activity, smoking, HDL-cholesterol, triglycerides and blood pressure, the association with waist-hip-ratio became much weaker and was no longer significant, neither in women nor in men (Table 3). The strength of the association was reduced to some extent for body weight, BMI and waist and hip circumference, but all associations remained highly significant in women, although the significance for waist and hip circumference was marginal in men. Considering categorical risk estimates for body weight, BMI and waist and hip circumference with similar adjustment, the risk generally increased with increasing quintiles of each anthropometric measure (Table 4), with some exceptions, especially in men. Tests for additional quadratic and cubic terms did not show any significant deviation from the log-linear relationships reported in Table 3, and results based on these relationships generally agreed with those from the categorical analysis. For example, the risk ratio of 1.087 per standard deviation for body weight (11.7 kg), shown for women in Table 3, corresponds to a risk ratio of  $1.087^2 = 1.182$  for a comparison between individuals 2 standard deviations (23.4 kg) apart and a risk ratio  $1.087^3 = 1.284$  for individuals 3 standard deviations (35.1 kg) apart.

As the waist-hip-ratio did not exhibit major associations with risk of LBP after adjustment for potential confounders, this factor was dropped in further analyses carried out with mutual adjustment for the anthropometric factors considered (Table 3). Both in women and men, the estimated association with body weight was strengthened in this analysis, although formal

**Table 2. Correlations between anthropometric measures, among individuals without chronic LBP at baseline.**

|                     | Women       |      |                     |                   |                 | Men         |      |                     |                   |                 |
|---------------------|-------------|------|---------------------|-------------------|-----------------|-------------|------|---------------------|-------------------|-----------------|
|                     | Body weight | BMI  | Waist circumference | Hip circumference | Waist-hip-ratio | Body weight | BMI  | Waist circumference | Hip circumference | Waist-hip-ratio |
| Body weight         | 1.00        | 0.91 | 0.85                | 0.88              | 0.45            | 1.00        | 0.85 | 0.82                | 0.85              | 0.45            |
| BMI                 |             | 1.00 | 0.86                | 0.87              | 0.49            |             | 1.00 | 0.82                | 0.76              | 0.54            |
| Waist circumference |             |      | 1.00                | 0.85              | 0.75            |             |      | 1.00                | 0.78              | 0.80            |
| Hip circumference   |             |      |                     | 1.00              | 0.30            |             |      |                     | 1.00              | 0.26            |
| Waist-hip-ratio     |             |      |                     |                   | 1.00            |             |      |                     |                   | 1.00            |

BMI, body mass index.

doi:10.1371/journal.pone.0141268.t002



**Table 3. Log-linear associations between anthropometric measures and risk of chronic LBP, among individuals without chronic LBP at baseline.**

|                     | Women                            |                                                         |                                           |                                  | Men                                                     |                                           |                                  |                                                         |                                           |
|---------------------|----------------------------------|---------------------------------------------------------|-------------------------------------------|----------------------------------|---------------------------------------------------------|-------------------------------------------|----------------------------------|---------------------------------------------------------|-------------------------------------------|
|                     | Adjustment for age only          | Complete adjustment for other risk factors <sup>a</sup> | Additional mutual adjustment <sup>b</sup> | Adjustment for age only          | Complete adjustment for other risk factors <sup>a</sup> | Additional mutual adjustment <sup>b</sup> | Adjustment for age only          | Complete adjustment for other risk factors <sup>a</sup> | Additional mutual adjustment <sup>b</sup> |
|                     | Risk ratio <sup>c</sup> (95% CI) | Risk ratio <sup>c</sup> (95% CI)                        | Risk ratio <sup>c</sup> (95% CI)          | Risk ratio <sup>c</sup> (95% CI) | Risk ratio <sup>c</sup> (95% CI)                        | Risk ratio <sup>c</sup> (95% CI)          | Risk ratio <sup>c</sup> (95% CI) | Risk ratio <sup>c</sup> (95% CI)                        | Risk ratio <sup>c</sup> (95% CI)          |
| Body weight         | 1.092 (1.049–1.136)              | 1.087 (1.039–1.138)                                     | 1.130 (0.995–1.284)                       | 1.115 (1.059–1.174)              | 1.091 (1.030–1.157)                                     | 1.124 (0.976–1.294)                       |                                  |                                                         |                                           |
| <i>P</i>            | < 0.001                          | < 0.001                                                 | 0.06                                      | < 0.001                          | 0.003                                                   | 0.11                                      |                                  |                                                         |                                           |
| BMI                 | 1.092 (1.049–1.137)              | 1.075 (1.023–1.128)                                     | 0.956 (0.846–1.080)                       | 1.125 (1.068–1.184)              | 1.091 (1.027–1.158)                                     | 1.062 (0.944–1.196)                       |                                  |                                                         |                                           |
| <i>P</i>            | < 0.001                          | 0.004                                                   | 0.47                                      | < 0.001                          | 0.004                                                   | 0.32                                      |                                  |                                                         |                                           |
| Waist circumference | 1.097 (1.053–1.143)              | 1.078 (1.025–1.134)                                     | 1.006 (0.908–1.115)                       | 1.108 (1.051–1.169)              | 1.064 (1.001–1.131)                                     | 0.951 (0.844–1.072)                       |                                  |                                                         |                                           |
| <i>P</i>            | < 0.001                          | 0.004                                                   | 0.91                                      | < 0.001                          | 0.05                                                    | 0.41                                      |                                  |                                                         |                                           |
| Hip circumference   | 1.078 (1.035–1.123)              | 1.073 (1.024–1.123)                                     | 0.995 (0.897–1.104)                       | 1.085 (1.029–1.144)              | 1.060 (1.000–1.123)                                     | 0.955 (0.853–1.068)                       |                                  |                                                         |                                           |
| <i>P</i>            | < 0.001                          | 0.003                                                   | 0.92                                      | 0.003                            | 0.05                                                    | 0.42                                      |                                  |                                                         |                                           |
| Waist-hip ratio     | 1.073 (1.032–1.116)              | 1.033 (0.985–1.084)                                     |                                           | 1.090 (1.031–1.151)              | 1.037 (0.975–1.102)                                     |                                           |                                  |                                                         |                                           |
| <i>P</i>            | < 0.001                          | 0.18                                                    |                                           | 0.002                            | 0.25                                                    |                                           |                                  |                                                         |                                           |

LBP, low back pain; CI, confidence interval; BMI, body mass index.

<sup>a</sup>Adjustment for age, education, work status, physical activity, smoking, HDL-cholesterol, triglycerides and blood pressure.

<sup>b</sup>Additional mutual adjustment for body weight, BMI, waist circumference and hip circumference.

<sup>c</sup>Per standard deviation of each variable.

doi:10.1371/journal.pone.0141268.t003

**Table 4. Risk of chronic LBP by quintiles of body weight, BMI and waist and hip circumference, among individuals without chronic LBP at baseline.**

|                          | Women          |                                  |             | Men            |                                  |             |
|--------------------------|----------------|----------------------------------|-------------|----------------|----------------------------------|-------------|
|                          | Quintile range | Risk ratio <sup>a</sup> (95% CI) |             | Quintile range | Risk ratio <sup>a</sup> (95% CI) |             |
| Body weight (kg)         |                |                                  |             |                |                                  |             |
|                          | ≤ 61.0         | 1.00                             | (reference) | ≤ 74.5         | 1.00                             | (reference) |
|                          | 61.5–66.5      | 1.03                             | (0.90–1.18) | 75.0–80.5      | 1.24                             | (1.04–1.48) |
|                          | 67.0–72.5      | 1.17                             | (1.02–1.33) | 81.0–86.0      | 0.97                             | (0.80–1.18) |
|                          | 73.0–80.0      | 1.17                             | (1.02–1.34) | 86.5–93.5      | 1.17                             | (0.97–1.41) |
|                          | ≥ 80.5         | 1.23                             | (1.06–1.42) | ≥ 94.0         | 1.36                             | (1.13–1.64) |
| BMI (kg/m <sup>2</sup> ) |                |                                  |             |                |                                  |             |
|                          | ≤ 22.6         | 1.00                             | (reference) | ≤ 23.9         | 1.00                             | (reference) |
|                          | 22.7–24.5      | 1.03                             | (0.90–1.17) | 24.0–25.6      | 1.01                             | (0.84–1.21) |
|                          | 24.6–26.6      | 1.19                             | (1.04–1.35) | 25.7–27.2      | 1.06                             | (0.88–1.26) |
|                          | 26.7–29.5      | 1.15                             | (1.01–1.33) | 27.3–29.2      | 1.14                             | (0.95–1.37) |
|                          | ≥ 29.6         | 1.27                             | (1.09–1.47) | ≥ 29.3         | 1.31                             | (1.08–1.58) |
| Waist circumference (cm) |                |                                  |             |                |                                  |             |
|                          | ≤ 72           | 1.00                             | (reference) | ≤ 85           | 1.00                             | (reference) |
|                          | 73–77          | 1.15                             | (1.00–1.31) | 86–90          | 0.90                             | (0.75–1.08) |
|                          | 78–82          | 1.23                             | (1.08–1.40) | 91–94          | 1.03                             | (0.86–1.23) |
|                          | 83–90          | 1.21                             | (1.05–1.40) | 95–99          | 1.09                             | (0.91–1.32) |
|                          | ≥ 91           | 1.28                             | (1.10–1.49) | ≥ 100          | 1.07                             | (0.88–1.31) |
| Hip circumference (cm)   |                |                                  |             |                |                                  |             |
|                          | ≤ 94           | 1.00                             | (reference) | ≤ 98           | 1.00                             | (reference) |
|                          | 95–99          | 0.98                             | (0.86–1.12) | 99–101         | 1.06                             | (0.89–1.27) |
|                          | 100–103        | 1.16                             | (1.02–1.32) | 102–104        | 1.13                             | (0.95–1.35) |
|                          | 104–109        | 1.20                             | (1.05–1.37) | 105–107        | 1.07                             | (0.90–1.28) |
|                          | ≥ 110          | 1.15                             | (1.00–1.33) | ≥ 108          | 1.22                             | (1.02–1.47) |

LBP, low back pain; BMI, body mass index; CI, confidence interval.

<sup>a</sup>Adjustment for age, education, work status, physical activity, smoking, HDL-cholesterol, triglycerides and blood pressure.

doi:10.1371/journal.pone.0141268.t004

statistical significance was no longer attained. Among men, BMI also retained a moderate positive association with LBP in this analysis, but otherwise the risk ratios did no longer reflect apparent associations. Separate analyses, not included in Table 3, showed that the association with BMI among women disappeared already after adjustment for body weight. In contrast, adjustment for waist or hip circumference led to a marked reduction but not complete elimination of the association with BMI. On the other hand, the association with body weight was strengthened by adjustment for BMI, and to some extent also by separate adjustment for waist or hip circumference. The associations with waist or hip circumference were substantially reduced by adjustment for BMI and completely disappeared after adjustment for body weight. A similar pattern was seen in men after partial mutual adjustment, except for the effect of BMI which was not entirely eliminated.

Particular analyses were also carried out to assess associations with body weight with additional adjustment for body height but not BMI. The estimated standardized associations with body weight were in these situations very similar to those shown for corresponding analyses of BMI, not including body weight or height.



## Associations with recurrence or persistence of LBP

In age-adjusted analyses restricted to women who reported LBP at baseline, all measures of body size showed significant positive associations with occurrence of LBP at follow-up (Table 5). Similar significant associations were only seen for BMI and waist circumference in men, with no significant associations remaining after adjustment for other potential confounders. Among women, the association with waist-hip-ratio was no longer significant after such adjustment. No definite associations were observed in either sex after further mutual adjustment among the anthropometric measures (Table 5).

## Discussion

This work attempts to compare associations with chronic LBP for several measures of body size, despite strong correlations between the measures considered. After adjustment for other risk factors, the four variables body weight, BMI, waist circumference and hip circumference all showed about equally strong associations with LBP in women free of LBP at baseline. In men, body weight and BMI appeared to be somewhat stronger predictors than waist and hip circumference. Mutual adjustment for anthropometric measures produced a different overall impression, and only body weight seemed to incorporate a component with an independent effect on risk of LBP among women. In men, BMI still appeared to play a certain role in addition to body weight, after effects of the other measures on risk had been taken into account. In contrast, for participants who reported LBP at baseline, no particular measure seemed to have an independent effect on the probability of having LBP at end of follow-up after mutual adjustment, except perhaps for BMI in men.

Our results are based on a relatively large population-based data set with standardized anthropometric measurements performed at baseline in connection with a clinical examination. The intervening period before final assessment of LBP was long enough for possible effects related to anthropometric features to become manifest. Baseline information was available on potential confounders and it was possible to carry out separate analyses among those free of LBP at baseline and those affected. Unfortunately no information was collected about LBP at other times. Moreover, the LBP status recorded at baseline and end of follow-up relied on information provided by the participants, and no attempt was made to characterize the severity of the pain. Although the initial survey at baseline had a reasonable response rate, participation was unfortunately lower in the final survey and may have depended to some extent on socioeconomic status [42].

Associations with BMI among adults have been examined in a great many studies of LBP, but few studies have dealt with body weight as a separate risk factor, probably because of the strong correlation between the two variables. In some prospective studies broadly similar results have been found for the two variables, often with definite positive associations with both body weight and BMI in women and less definite results in men [15,16]. A cross-sectional study found no clear associations at all [17]. Results regarding waist circumference have been more varied. Some cross-sectional studies [21,22] have shown positive associations between waist circumference and prevalence of LBP in women, in parallel with similar associations with BMI, but no associations among men. In one prospective study [20] including both sexes, waist circumference showed a positive association with occurrence of radiating LBP but not with non-specific LBP. A marginal positive association was found in a short-term prospective study of male conscripts [19]. Hip circumference showed a positive relationship with prevalence of LBP among women in one study [22] but not in another [17]. Waist-hip-ratio was associated with occurrence of LBP in women in one prospective study [44] and a couple of cross-sectional studies [21,22,45], with no relationship being found among men. A small case-control study [17] reported an inverse association with waist-hip-ratio.

**Table 5. Log-linear associations between anthropometric measures and recurrence or persistence of chronic LBP, among individuals with chronic LBP at baseline.**

|                     | Women                            |                                                         |                                           |                                  | Men                                                     |                                           |                                  |                                                         |                                           |
|---------------------|----------------------------------|---------------------------------------------------------|-------------------------------------------|----------------------------------|---------------------------------------------------------|-------------------------------------------|----------------------------------|---------------------------------------------------------|-------------------------------------------|
|                     | Adjustment for age only          | Complete adjustment for other risk factors <sup>a</sup> | Additional mutual adjustment <sup>b</sup> | Adjustment for age only          | Complete adjustment for other risk factors <sup>a</sup> | Additional mutual adjustment <sup>b</sup> | Adjustment for age only          | Complete adjustment for other risk factors <sup>a</sup> | Additional mutual adjustment <sup>b</sup> |
|                     | Risk ratio <sup>c</sup> (95% CI) | Risk ratio <sup>c</sup> (95% CI)                        | Risk ratio <sup>c</sup> (95% CI)          | Risk ratio <sup>c</sup> (95% CI) | Risk ratio <sup>c</sup> (95% CI)                        | Risk ratio <sup>c</sup> (95% CI)          | Risk ratio <sup>c</sup> (95% CI) | Risk ratio <sup>c</sup> (95% CI)                        | Risk ratio <sup>c</sup> (95% CI)          |
| Body weight         | 1.073 (1.048–1.098)              | 1.065 (1.037–1.094)                                     | 1.030 (0.951–1.116)                       | 1.015 (0.973–1.059)              | 1.005 (0.960–1.052)                                     | 0.906 (0.814–1.009)                       |                                  |                                                         |                                           |
| <i>P</i>            | < 0.001                          | < 0.001                                                 | 0.46                                      | 0.49                             | 0.84                                                    | 0.07                                      |                                  |                                                         |                                           |
| BMI                 | 1.067 (1.043–1.092)              | 1.060 (1.032–1.088)                                     | 0.992 (0.922–1.068)                       | 1.044 (1.002–1.088)              | 1.032 (0.986–1.079)                                     | 1.090 (0.997–1.192)                       |                                  |                                                         |                                           |
| <i>P</i>            | < 0.001                          | < 0.001                                                 | 0.84                                      | 0.04                             | 0.18                                                    | 0.06                                      |                                  |                                                         |                                           |
| Waist circumference | 1.071 (1.046–1.096)              | 1.066 (1.035–1.099)                                     | 1.006 (0.944–1.072)                       | 1.044 (1.002–1.087)              | 1.019 (0.974–1.067)                                     | 1.017 (0.937–1.103)                       |                                  |                                                         |                                           |
| <i>P</i>            | < 0.001                          | < 0.001                                                 | 0.86                                      | 0.04                             | 0.41                                                    | 0.70                                      |                                  |                                                         |                                           |
| Hip circumference   | 1.074 (1.049–1.099)              | 1.069 (1.040–1.098)                                     | 1.042 (0.978–1.111)                       | 1.032 (0.989–1.076)              | 1.016 (0.971–1.062)                                     | 1.023 (0.938–1.115)                       |                                  |                                                         |                                           |
| <i>P</i>            | < 0.001                          | < 0.001                                                 | 0.20                                      | 0.15                             | 0.49                                                    | 0.61                                      |                                  |                                                         |                                           |
| Waist-hip ratio     | 1.038 (1.011–1.065)              | 1.021 (0.989–1.054)                                     |                                           | 1.038 (0.997–1.081)              | 1.014 (0.969–1.061)                                     |                                           |                                  |                                                         |                                           |
| <i>P</i>            | 0.005                            | 0.20                                                    |                                           | 0.07                             | 0.55                                                    |                                           |                                  |                                                         |                                           |

LBP, low back pain; CI, confidence interval; BMI, body mass index.

<sup>a</sup>Adjustment for age, education, work status, physical activity, smoking, HDL-cholesterol, triglycerides and blood pressure.

<sup>b</sup>Additional mutual adjustment for body weight, BMI, waist circumference and hip circumference.

<sup>c</sup>Per standard deviation of each variable.

doi:10.1371/journal.pone.0141268.t005

As estimates have been computed with different measurement units or categorization and with different adjustment, it is difficult to compare the strength of the associations for the various anthropometric factors considering results from separate studies. In one relatively large cross-sectional study [21], waist circumference clearly exhibited a stronger association with LBP among women than did BMI or waist-hip-ratio. In an analysis of associations with BMI and waist and hip circumference among young adults [22], the positive association with waist circumference was the only one remaining after complete mutual adjustment.

Both our analyses of risk of LBP among individuals without LBP at baseline and our analyses of recurrence or persistence indicate that the age-adjusted association seen with the waist-hip-ratio largely disappears after adjustment for other risk factors. This suggests that central adiposity in itself is not an important factor for explaining the occurrence of LBP. This result does not carry similar implications about total fat mass, as the waist-hip-ratio shows much weaker correlations with total fat mass than the other measures considered [46].

In women without LBP at baseline, the variables body weight, BMI, waist and hip circumference all showed significant positive associations with occurrence of LBP at end of follow-up. All four associations may to a large extent reflect a common underlying relationship between total fat mass and LBP. If this hypothesis is correct, any association remaining after mutual adjustment should mainly represent other underlying explanatory components. Actually body weight was the only relevant predictor of risk after mutual adjustment. This may indicate that heavy mechanical or structural loads on the spine play an essential role in the etiology of LBP among women. In men without LBP at baseline, a somewhat different picture emerged, with body weight and BMI showing stronger associations than waist and hip circumference after adjustment for other risk factors. Moreover, the association with BMI did not entirely disappear after mutual adjustment. The overall interpretation is still similar to that in women, with results being consistent with a common relationship between total fat mass and LBP, in addition to a strong mechanical or structural component. The minor discrepancies observed between results in women and men may reflect general sex differences in body structure. The lack of association seen among individuals with LBP at baseline after mutual adjustment suggests that mechanical or structural factors may not be equally important for persistence or recurrence of LBP, although a common underlying relationship mediated by total fat mass may still play a major role, in particular in women.

It should be emphasized that waist and hip circumference may in general still be essential predictors of risk of LBP, despite the finding that these covariates did not contribute to prediction after mutual adjustment for body measures. The mutually adjusted analyses are only meant to reveal additional associations specific to particular measures, above potential associations reflecting common underlying factors. The major correlations between anthropometric measures displayed in Table 2 will greatly influence any regression analysis attempting to separate independent effects in this manner. For ordinary interpretation of relationships between each measure and risk of LBP, the separate risk ratios shown in the middle columns for each sex in Tables 3 and 5, or the categorical estimates in Table 4, describe the relevant associations.

Our attempt to compare associations with LBP for different measures of body size is similar to attempts made for other medical conditions. Comparisons have frequently been carried out by examining the magnitude of the separate associations after adjustment for other potential confounders, as for risk of cardiovascular disease [47], for risk of incident diabetes [48] or for overall or cause specific mortality [35,49]. Measures such as waist circumference [35] or waist-hip-ratio [49] have in many cases shown stronger associations with mortality than BMI. In some studies mutual adjustment has also been carried out to determine whether particular risk factors confer an additional risk above that predicted by other measures. This has mostly been achieved by categorical adjustment, but there are also examples of continuous mutual

adjustment [50]. It has been pointed out that categorical modeling may not be sufficient in these situations [51] when the strong correlation between predictors is taken into account.

Few studies of LBP have been carried out considering the body distribution of different tissues. In one study [45], central obesity and loss of muscle mass in the trunk and lower extremities were associated with the occurrence of non-sciatic LBP in women. In another study [52] higher levels of LBP intensity and disability were associated with body fat mass but not lean tissue mass.

The idea that the total fat mass may influence the risk of LBP is consistent with our results before mutual adjustment, but other more specific explanations are needed to account for the results after such adjustment. Structural degenerative changes may be responsible for relationships between body size and LBP [12], although it is not clear whether degenerative changes as seen on MRI are actually related to LBP [53]. Thus disc degeneration seems to be related to overweight [24,54] and a reduced disc height has been observed among obese [55]. Bariatric surgery, with subsequent weight reduction, has also been associated with increased intervertebral disc height [56]. Moreover, BMI and waist circumference have been found to be related to vertebral endplate changes [25]. It is more difficult to use our results to evaluate theories about associations between body size and LBP involving emotional or behavioral components or impaired blood supply to the lumbar region. It does not seem reasonable, however, that such theories should favor a relationship operating through body weight in particular.

This study apparently constitutes the first attempt in a cohort setting to compare associations with risk of LBP systematically for different measures of body size. Body height has already been found to be associated with risk of LBP among women in this data set [37]. For cardiovascular disease corresponding results may be important in the development of simple procedures to predict the risk pertaining to any particular individual, but this problem hardly arises for LBP. Our results may still contribute to the understanding of causal mechanisms, which in turn will make it easier to formulate suitable recommendations for prevention of LBP. At the moment it is difficult to provide comprehensive advice of this kind. Future work on risk of LBP should preferably take into account more detailed information about the relative amount of different body tissues, although it is currently expensive to obtain such information in large populations.

In connection with rehabilitation of LBP patients it has been stated that BMI may not be the most suitable measure of obesity to predict the outcome [57]. The data presented here indicate that simple body weight may provide at least an equally good basis for describing the risk of LBP as BMI, although more precise estimates of body composition may still offer considerably better possibilities.

## Acknowledgments

The Nord-Trøndelag Health Study (the HUNT study) is a collaboration between the HUNT Research Centre (Faculty of Medicine, the Norwegian University of Science and Technology NTNU), the Nord-Trøndelag County Council, Central Norway Health Authority, and the Norwegian Institute of Public Health. Laboratory measurements were carried out at facilities owned by the Nord-Trøndelag Hospital Trust.

## Author Contributions

Conceived and designed the experiments: Ingrid Heuch Ivar Heuch JAZ. Performed the experiments: Ingrid Heuch. Analyzed the data: Ingrid Heuch Ivar Heuch. Contributed reagents/materials/analysis tools: KH JAZ. Wrote the paper: Ingrid Heuch.

## References

1. Guh DP, Zhang W, Bansback N, Amarsi Z, Birmingham CL, Anis AH. The incidence of co-morbidities related to obesity and overweight: a systematic review and meta-analysis. *BMC Public Health*. 2009; 9: 88. doi: [10.1186/1471-2458-9-88](https://doi.org/10.1186/1471-2458-9-88) PMID: [19320986](https://pubmed.ncbi.nlm.nih.gov/19320986/)
2. Hoy D, March L, Brooks P, Blyth F, Woolf A, Bain C, et al. The global burden of low back pain: estimates from the Global Burden of Disease 2010 study. *Ann Rheum Dis*. 2014; 73: 968–974. doi: [10.1136/annrheumdis-2013-204428](https://doi.org/10.1136/annrheumdis-2013-204428) PMID: [24665116](https://pubmed.ncbi.nlm.nih.gov/24665116/)
3. Hong J, Reed C, Novick D, Happich M. Costs associated with treatment of chronic low back pain: an analysis of the UK General Practice Research Database. *Spine (Phila Pa 1976)*. 2013; 38: 75–82.
4. Deyo RA, Weinstein JN. Low back pain. *N Engl J Med*. 2001; 344: 363–370. PMID: [11172169](https://pubmed.ncbi.nlm.nih.gov/11172169/)
5. Heneweer H, Staes F, Aufdemkampe G, van Rijn M, Vanhees L. Physical activity and low back pain: a systematic review of recent literature. *Eur Spine J*. 2011; 20: 826–845. doi: [10.1007/s00586-010-1680-7](https://doi.org/10.1007/s00586-010-1680-7) PMID: [21221663](https://pubmed.ncbi.nlm.nih.gov/21221663/)
6. Coenen P, Kingma I, Boot CR, Bongers PM, van Dieën JH. Cumulative mechanical low-back load at work is a determinant of low-back pain. *Occup Environ Med*. 2014; 71: 332–337. doi: [10.1136/oemed-2013-101862](https://doi.org/10.1136/oemed-2013-101862) PMID: [24676271](https://pubmed.ncbi.nlm.nih.gov/24676271/)
7. Shiri R, Karppinen J, Leino-Arjas P, Solovieva S, Viikari-Juntura E. The association between smoking and low back pain: a meta-analysis. *Amer J Med*. 2010; 123: 87.e7–87.e35.
8. Aro S, Leino P. Overweight and musculoskeletal morbidity: a ten-year follow-up. *Int J Obes*. 1985; 9: 267–275. PMID: [4066114](https://pubmed.ncbi.nlm.nih.gov/4066114/)
9. Garzillo MJD, Garzillo TAF. Does obesity cause low back pain? *J Manipulative Physiol Ther*. 1994; 17: 601–604. PMID: [7884330](https://pubmed.ncbi.nlm.nih.gov/7884330/)
10. Leboeuf-Yde C. Body weight and low back pain. A systematic literature review of 56 journal articles reporting on 65 epidemiologic studies. *Spine (Phila Pa 1976)*. 2000; 25: 226–237.
11. Mirtz TA, Greene L. Is obesity a risk factor for low back pain? An example of using the evidence to answer a clinical question. *Chiropr Osteopat*. 2005; 13: 2. PMID: [15967048](https://pubmed.ncbi.nlm.nih.gov/15967048/)
12. Shiri R, Karppinen J, Leino-Arjas P, Solovieva S, Viikari-Juntura E. The association between obesity and low back pain: a meta-analysis. *Amer J Epidemiol*. 2010; 171: 135–154.
13. Nilsen TI, Holtermann A, Mork PJ. Physical exercise, body mass index, and risk of chronic pain in the low back and neck/shoulders: longitudinal data from the Nord-Trøndelag Health Study. *Amer J Epidemiol*. 2011; 174: 267–273.
14. Heuch I, Heuch I, Hagen K, Zwart JA. Body mass index as a risk factor for developing chronic low back pain: a follow-up in the Nord-Trøndelag Health Study. *Spine (Phila Pa 1976)*. 2013; 38: 133–139.
15. Croft PR, Rigby AS. Socioeconomic influences on back problems in the community in Britain. *J Epidemiol Community Health*. 1994; 48: 166–170. PMID: [8189172](https://pubmed.ncbi.nlm.nih.gov/8189172/)
16. Croft PR, Papageorgiou AC, Thomas E, Macfarlane GJ, Silman AJ. Short-term physical risk factors for new episodes of low back pain. Prospective evidence from the South Manchester Back Pain Study. *Spine (Phila Pa 1976)*. 1999; 24: 1556–1561.
17. Yip YB, Ho SC, Chan SG. Tall stature, overweight and the prevalence of low back pain in Chinese middle-aged women. *Int J Obes Relat Metab Disord*. 2001; 25: 887–892. PMID: [11439304](https://pubmed.ncbi.nlm.nih.gov/11439304/)
18. Lean ME, Han TS, Seidell JC. Impairment of health and quality of life in people with large waist circumference. *Lancet*. 1998; 351: 853–856. PMID: [9525361](https://pubmed.ncbi.nlm.nih.gov/9525361/)
19. Taanila HP, Suni JH, Pihlajamäki HK, Mattila VM, Ohrankämnen O, Vuorinen P, et al. Predictors of low back pain in physically active conscripts with special emphasis on muscular fitness. *Spine J*. 2012; 12: 737–748. doi: [10.1016/j.spinee.2012.01.006](https://doi.org/10.1016/j.spinee.2012.01.006) PMID: [22297262](https://pubmed.ncbi.nlm.nih.gov/22297262/)
20. Shiri R, Solovieva S, Husgafvel-Pursiainen K, Telama R, Yang X, Viikari J, et al. The role of obesity and physical activity in non-specific and radiating low back pain: the Young Finns study. *Semin Arthritis Rheum*. 2013; 42: 640–650. doi: [10.1016/j.semarthrit.2012.09.002](https://doi.org/10.1016/j.semarthrit.2012.09.002) PMID: [23270761](https://pubmed.ncbi.nlm.nih.gov/23270761/)
21. Han TS, Schouten JSAG, Lean MEJ, Seidell JC. The prevalence of low back pain and associations with body fatness, fat distribution and height. *Int J Obes*. 1997; 21: 600–607.
22. Shiri R, Solovieva S, Husgafvel-Pursiainen K, Taimela S, Saarikoski LA, Huupponen R et al. The association between obesity and the prevalence of low back pain in young adults: the Cardiovascular Risk in Young Finns Study. *Am J Epidemiol*. 2008; 167: 1110–1119. doi: [10.1093/aje/kwn007](https://doi.org/10.1093/aje/kwn007) PMID: [18334501](https://pubmed.ncbi.nlm.nih.gov/18334501/)
23. Janke EA, Collins A, Kozak AT. Overview of the relationship between pain and obesity: What do we know? Where do we go next? *J Rehabil Res Dev*. 2007; 44: 245–262. PMID: [17551876](https://pubmed.ncbi.nlm.nih.gov/17551876/)

24. Liuke M, Solovieva S, Lamminen A, Luoma K, Leino-Arjas P, Luukkonen R, et al. Disc degeneration of the lumbar spine in relation to overweight. *Int J Obes (Lond)*. 2005; 29: 903–908.
25. Kuisma M, Karppinen J, Haapea M, Niinimäki J, Ojala R, Heliövaara M, et al. Are the determinants of vertebral endplate changes and severe disc degeneration in the lumbar spine the same? A magnetic resonance imaging study in middle-aged male workers. *BMC Musculoskelet Disord*. 2008; 9: 51. doi: [10.1186/1471-2474-9-51](https://doi.org/10.1186/1471-2474-9-51) PMID: [18416819](https://pubmed.ncbi.nlm.nih.gov/18416819/)
26. Mellin G. Correlations of spinal mobility with degree of chronic low back pain after correction for age and anthropometric factors. *Spine (Phila Pa 1976)*. 1987; 12: 464–468.
27. Kauppila LI, McAlindon T, Evans S, Wilson PW, Kiel D, Felson DT. Disc degeneration/back pain and calcification of the abdominal aorta: a 25-year follow-up study in Framingham. *Spine (Phila Pa 1976)*. 1997; 22: 1642–1647.
28. Tilg H, Moschen AR. Adipocytokines: mediators linking adipose tissue, inflammation and immunity. *Nat Rev Immunol*. 2006; 6: 772–783. PMID: [16998510](https://pubmed.ncbi.nlm.nih.gov/16998510/)
29. Berentzen TL, Ångquist L, Kotronen A, Borra R, Yki-Järvinen H, Iozzo P, et al. Waist circumference adjusted for body mass index and intra-abdominal fat mass. *PLoS One*. 2012; 7: e32213. doi: [10.1371/journal.pone.0032213](https://doi.org/10.1371/journal.pone.0032213) PMID: [22384179](https://pubmed.ncbi.nlm.nih.gov/22384179/)
30. Heymsfield SB, Scherzer R, Pietrobelli A, Lewis CE, Grunfeld C. Body mass index as a phenotypic expression of adiposity: quantitative contribution of muscularity in a population-based sample. *Int J Obes (Lond)*. 2009; 33: 1363–1373.
31. Srikanthan P, Seeman TE, Karlamangla AS. Waist-hip-ratio as a predictor of all-cause mortality in high-functioning older adults. *Ann Epidemiol*. 2009; 19: 724–731. doi: [10.1016/j.annepidem.2009.05.003](https://doi.org/10.1016/j.annepidem.2009.05.003) PMID: [19596204](https://pubmed.ncbi.nlm.nih.gov/19596204/)
32. Snijder MB, Dekker JM, Visser M, Yudkin JS, Stehouwer CD, Bouter LM, et al. Larger thigh and hip circumferences are associated with better glucose tolerance: the Hoorn study. *Obes Res*. 2003; 11: 104–111. PMID: [12529492](https://pubmed.ncbi.nlm.nih.gov/12529492/)
33. Vinknes KJ, Elshorbagy AK, Drevon CA, Gjesdal CG, Tell GS, Nygård O, et al. Evaluation of the body adiposity index in a Caucasian population: the Hordaland Health Study. *Am J Epidemiol*. 2013; 177: 586–592. doi: [10.1093/aje/kws271](https://doi.org/10.1093/aje/kws271) PMID: [23444101](https://pubmed.ncbi.nlm.nih.gov/23444101/)
34. Canoy D, Boekholdt SM, Wareham N, Luben R, Welch A, Bingham S, et al. Body fat distribution and risk of coronary heart disease in men and women in the European Prospective Investigation Into Cancer and Nutrition in Norfolk cohort: a population-based prospective study. *Circulation*. 2007; 116: 2933–2943. PMID: [18071080](https://pubmed.ncbi.nlm.nih.gov/18071080/)
35. Zhang C, Rexrode KM, van Dam RM, Li TY, Hu FB. Abdominal obesity and the risk of all-cause, cardiovascular, and cancer mortality: sixteen years of follow-up in US women. *Circulation*. 2008; 117: 1658–1667. doi: [10.1161/CIRCULATIONAHA.107.739714](https://doi.org/10.1161/CIRCULATIONAHA.107.739714) PMID: [18362231](https://pubmed.ncbi.nlm.nih.gov/18362231/)
36. Staiano AE, Reeder BA, Elliott S, Joffres MR, Pahwa P, Kirkland SA, et al. Body mass index versus waist circumference as predictors of mortality in Canadian adults. *Int J Obes (Lond)*. 2012; 36: 1450–1454.
37. Heuch I, Heuch I, Hagen K, Zwart JA. Association between body height and chronic low back pain: a follow-up in the Nord-Trøndelag Health Study. *BMJ Open*. 2015; 5: e006983. doi: [10.1136/bmjopen-2014-006983](https://doi.org/10.1136/bmjopen-2014-006983) PMID: [26078308](https://pubmed.ncbi.nlm.nih.gov/26078308/)
38. Holmen J, Midthjell K, Kruger Ø, Langhammer A, Holmen TL, Bratberg GH, et al. The Nord-Trøndelag Health Study 1995–97 (HUNT 2): objectives, contents, methods and participation. *Norw J Epidemiol*. 2003; 13: 19–32.
39. Kurtze N, Rangul V, Hustvedt BE, Flanders WD. Reliability and validity of self-reported physical activity in the Nord-Trøndelag Health Study: HUNT 1. *Scand J Public Health*. 2008; 36: 52–61. doi: [10.1177/1403494807085373](https://doi.org/10.1177/1403494807085373) PMID: [18426785](https://pubmed.ncbi.nlm.nih.gov/18426785/)
40. Krokstad S, Langhammer A, Hveem K, Holmen T, Midthjell K, Stene T, et al. Cohort profile: the HUNT Study, Norway. *Int J Epidemiol*. 2013; 42: 617–622.
41. Merskey HB, Bogduk N. Classification of chronic pain: descriptions of chronic pain syndromes and definitions of pain terms. Seattle, WA: IASP Press; 1994. pp. 39–58.
42. Langhammer A, Krokstad S, Romundstad P, Heggland J, Holmen J. The HUNT study: participation is associated with survival and depends on socioeconomic status, diseases and symptoms. *BMC Med Res Methodol*. 2012; 12: 143. doi: [10.1186/1471-2288-12-143](https://doi.org/10.1186/1471-2288-12-143) PMID: [22978749](https://pubmed.ncbi.nlm.nih.gov/22978749/)
43. Heuch I, Heuch I, Hagen K, Zwart JA. Associations between serum lipid levels and chronic low back pain. *Epidemiology*. 2010; 21: 837–841. doi: [10.1097/EDE.0b013e3181f20808](https://doi.org/10.1097/EDE.0b013e3181f20808) PMID: [20798637](https://pubmed.ncbi.nlm.nih.gov/20798637/)
44. Hemingway H, Shipley M, Stansfeld S, Shannon H, Frank J, Brunner E, et al. Are risk factors for atherothrombotic disease associated with back pain sickness absence? The Whitehall II Study. *J Epidemiol Community Health*. 1999; 53: 197–203. PMID: [10396544](https://pubmed.ncbi.nlm.nih.gov/10396544/)



45. Toda Y, Segal N, Toda T, Morimoto T, Ogawa R. Lean body mass and body fat distribution in participants with chronic low back pain. *Arch Intern Med*. 2000; 160: 3265–3269. PMID: [11088088](#)
46. Barreira TV, Staiano AE, Harrington DM, Heymsfield SB, Smith SR, Bouchard C, et al. Anthropometric correlates of total body fat, abdominal adiposity, and cardiovascular disease risk factors in a biracial sample of men and women. *Mayo Clin Proc*. 2012; 87: 452–460. doi: [10.1016/j.mayocp.2011.12.017](#) PMID: [22560524](#)
47. Emerging Risk Factors Collaboration. Separate and combined associations of body-mass index and abdominal adiposity with cardiovascular disease: collaborative analysis of 58 prospective studies. *Lancet*. 2011; 377: 1085–1095. doi: [10.1016/S0140-6736\(11\)60105-0](#) PMID: [21397319](#)
48. Vazquez G, Duval S, Jacobs DR Jr, Silventoinen K. Comparison of body mass index, waist circumference, and waist/hip ratio in predicting incident diabetes: a meta-analysis. *Epidemiol Rev*. 2007; 29: 115–128. PMID: [17494056](#)
49. Price GM, Uauy R, Breeze E, Bulpitt CJ, Fletcher AE. Weight, shape, and mortality risk in older persons: elevated waist-hip ratio, not high body mass index, is associated with a greater risk of death. *Am J Clin Nutr*. 2006; 84: 449–460. PMID: [16895897](#)
50. Bigaard J, Tjønneland A, Thomsen BL, Overvad K, Heitmann BL, Sørensen TI. Waist circumference, BMI, smoking, and mortality in middle-aged men and women. *Obes Res*. 2003; 11: 895–903. PMID: [12855760](#)
51. Keith SW, Fontaine KR, Allison DB. Mortality rate and overweight: Overblown or underestimated? A commentary on a recent meta-analysis of the associations of BMI and mortality. *Mol Metab*. 2013; 2: 65–68. doi: [10.1016/j.molmet.2013.03.005](#) PMID: [24199152](#)
52. Urquhart DM, Berry P, Wluka AE, Strauss BJ, Wang Y, Proietto J, et al. 2011 Young Investigator Award winner: Increased fat mass is associated with high levels of low back pain intensity and disability. *Spine (Phila Pa 1976)*. 2011; 36: 1320–1325.
53. Chou D, Samartzis D, Bellabarba C, Patel A, Luk KD, Kisser JM, et al. Degenerative magnetic resonance imaging changes in patients with chronic low back pain: a systematic review. *Spine (Phila Pa 1976)*. 2011; 36: S43–S53.
54. Samartzis D, Karppinen J, Chan D, Luk KD, Cheung KM. The association of lumbar intervertebral disc degeneration on magnetic resonance imaging with body mass index in overweight and obese adults: a population-based study. *Arthritis Rheum*. 2012; 64: 1488–1496. doi: [10.1002/art.33462](#) PMID: [22287295](#)
55. Urquhart DM, Kurniadi I, Triangto K, Wang Y, Wluka AE, O'Sullivan R, et al. Obesity is associated with reduced disc height in the lumbar spine but not at the lumbosacral junction. *Spine (Phila Pa 1976)*. 2014; 39: E962–E966.
56. Lidar Z, Behrbalk E, Regev GJ, Salame K, Keynan O, Schweiger C, et al. Intervertebral disc height changes after weight reduction in morbidly obese patients and its effect on quality of life and radicular and low back pain. *Spine (Phila Pa 1976)*. 2012; 37: 1947–1952.
57. Brooks C, Siegler JC, Cheema BS, Marshall PW. No relationship between body mass index and changes in pain and disability after exercise rehabilitation for patients with mild to moderate chronic low back pain. *Spine (Phila Pa 1976)*. 2013; 38: 2190–2195.
